# Supplementary material
Source: PubMed Central journal article supplement (PMC4201266)

**Figure S1.** CD Spectra of 0.1 M GMPdss with 0.1 M of: Top: monobasic sodium phosphate ( $\text{NaH}_2\text{PO}_4$ ); Middle: monobasic potassium phosphate ( $\text{KH}_2\text{PO}_4$ ); Bottom: phosphoric acid ( $\text{H}_3\text{PO}_4$ ), at 5 °C (left) and 20 °C (right).

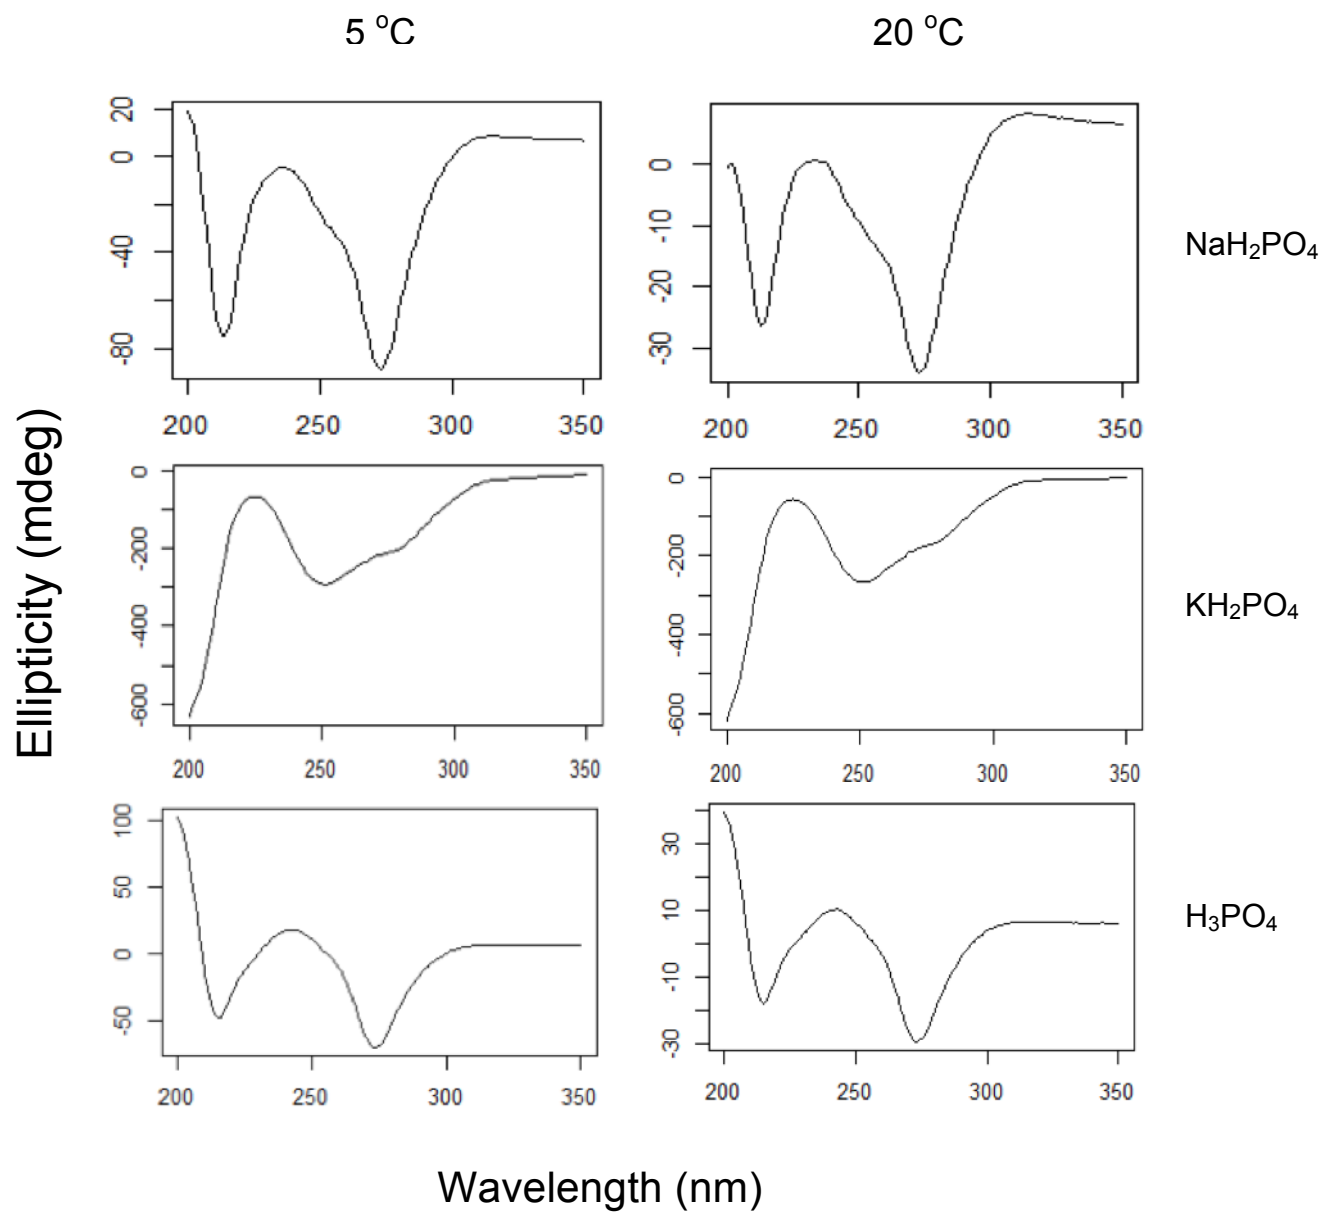

Supplement: Supp_Figure1.pdf [file Supp_Figure1.pdf]
