# Supplementary material
Source: PubMed Central journal article supplement (PMC4201266)

**Figure S2.** CD Spectra of GMPdss/XMPfa (0.1M each) at 5 °C, at pH 4.7 (blue), 7.0 (pink), 9.5 (green). Top: X=A. Bottom: X=C.

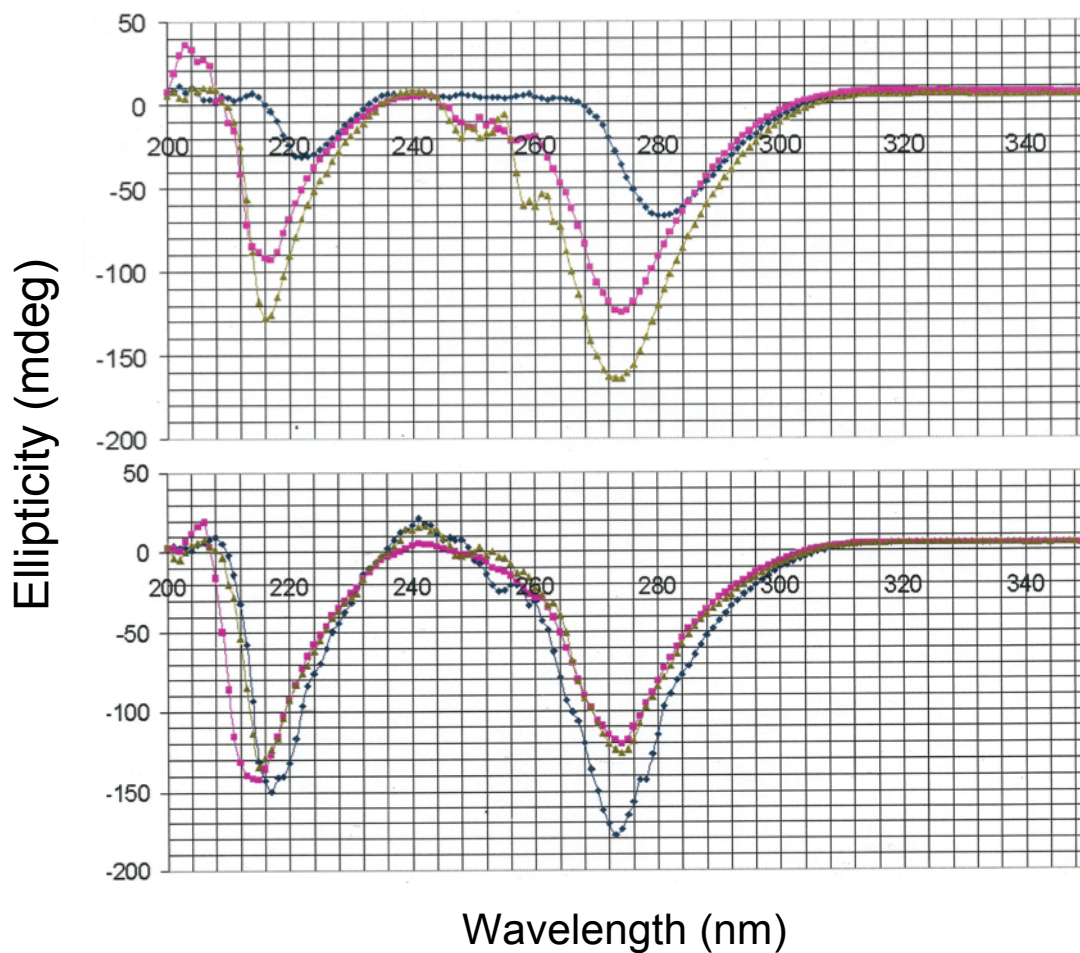

Supplement: Supp_Figure2.pdf [file Supp_Figure2.pdf]
